# Supplementary material for: Coronarin D Induces Apoptotic Cell Death and Cell Cycle Arrest in Human Glioblastoma Cell Line
Source: PubMed Central journal article supplement (PMC6943529; doi:10.3390/molecules24244498), 2019-12-09
Supplement: molecules-24-04498-s001.pdf [file molecules-24-04498-s001.pdf]

# Coronarin D Induces Apoptotic Cell Death and Cell Cycle Arrest in Human Glioblastoma Cell Line

Yollanda E. M. Franco <sup>1,2,\*†</sup>, Marcia Y. Okubo <sup>3,4†</sup>, Adriana Della Torre <sup>3</sup>, Paula P. Paiva <sup>3</sup>,  
Marcela N. Rosa <sup>5</sup>, Viviane A. O. Silva <sup>5</sup>, Rui M. Reis <sup>5,6,7</sup>, Ana Lucia T. G. Ruiz <sup>4,8</sup>, Paulo M.  
Imamura <sup>9</sup>, João Ernesto de Carvalho <sup>4,8</sup> and Giovanna B. Longato <sup>1,2</sup>

- <sup>1</sup> Research Laboratory in Molecular Pharmacology of Bioactive Compounds. São Francisco University - 12916-900 Bragança Paulista, SP, Brazil; carvalho@fcb.unicamp.br (G.B.L.)
  - <sup>2</sup> Posgraduate program in Health Science, São Francisco University - 12916-900 Bragança Paulista, SP, Brazil
  - <sup>3</sup> Chemical, Biological and Agricultural Pluridisciplinary Research Center (CPQBA), University of Campinas – UNICAMP, 13148-218 Paulínia, SP, Brazil; yumiookuboh@gmail.com (M.Y.O.); adriana\_biotech@yahoo.com.br (A.D.T.); paula.p21@gmail.com (P.P.P.)
  - <sup>4</sup> Posgraduate program in dentistry, Piracicaba Dental School, University of Campinas -13 414-903, Piracicaba, SP, Brazil; ana.ruiz@fcb.unicamp.br (A.L.T.G.T.); carvalho@fcb.unicamp.br (G.E.d.C.)
  - <sup>5</sup> Molecular Oncology Research Center, Barretos Cancer Hospital, Barretos, Brazil; nr.marcela2@gmail.com (M.N.R.); vivianeaos@gmail.com (V.A.O.S.); ruireis.hcb@gmail.com (R.M.R.)
  - <sup>6</sup> Life and Health Sciences Research Institute (ICVS), School of Medicine, University of Minho, Braga, Portugal
  - <sup>7</sup> ICVS/3B's – PT Government Associate Laboratory, Braga/Guimarães, Portugal
  - <sup>8</sup> Faculty of Pharmaceutical Sciences, University of Campinas, UNICAMP, 13081-970 Campinas, SP, Brazil
  - <sup>9</sup> Institute of Chemistry, University of Campinas-UNICAMP, P.O. Box 6154, 13083-970, Campinas, SP, Brazil; imam@iqm.unicamp.br (P.M.I.)
- \* Correspondence: yollanda.moreira@hotmail.com; Tel.: +55- 11- 996672895

† These authors contributed equally to this work.

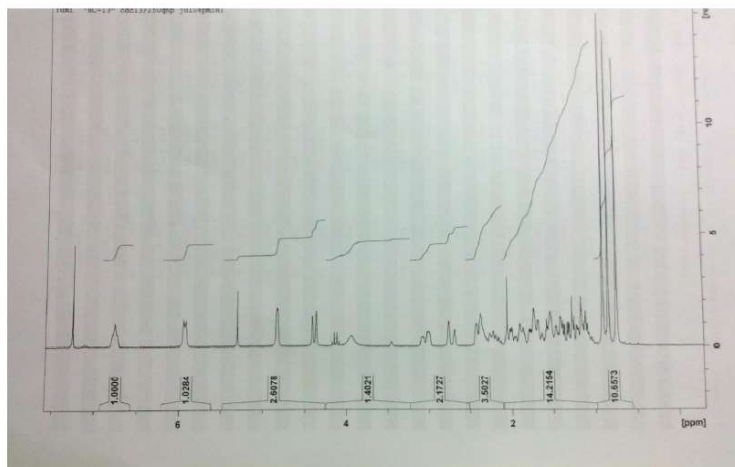

**Figure 1.** Coronarin D  $^1\text{H-NMR}$  spectra.

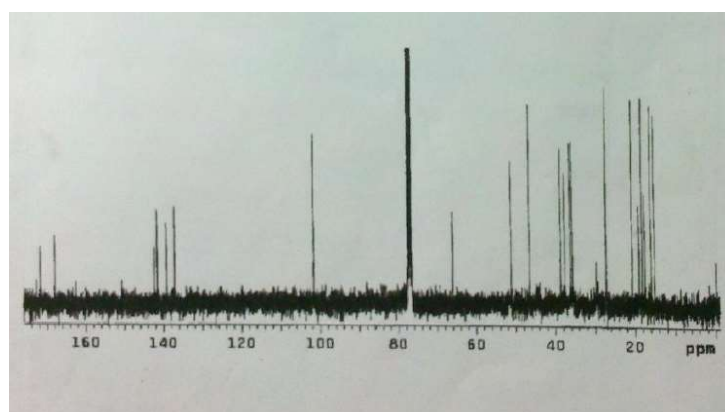

**Figure 2.** Coronarin D  $^{13}\text{C-NMR}$  spectra.

**Table S1.** Coronarin <sup>13</sup>C-NMR spectral data.

| <b>Carbon</b> | <b>Coronarin D</b> |
|---------------|--------------------|
| 1             | 392                |
| 2             | 193                |
| 3             | 42,0               |
| 4             | 335                |
| 5             | 553                |
| 6             | 241                |
| 7             | 378                |
| 8             | 1481               |
| 9             | 561                |
| 10            | 394                |
| 11            | 255                |
| 12            | 1436               |
| 13            | 1245               |
| 14            | 535                |
| 15            | 965                |
| 16            | 1707               |
| 17            | 1076               |
| 18            | 335                |
| 19            | 217                |
| 20            | 143                |
